# Supplementary material for: Delineating the effect of sex hormone intake on immunity in cis and trans women with HIV
Source: bioRxiv or medRxiv preprint supplement (doi:10.1101/2023.05.09.23289654), 2023-05-14
Supplement: Supplementary file [file media-1.pdf]

**Supplementary material for: Delineating the effect of sex hormone intake on immunity in cis and trans women with HIV**

**Supplementary Figure 1.** Distribution of CD4:CD8 ratio and lymphocyte counts in the different studied populations: CW aged 40 and younger (purple), CW 40-60 years-old (red), CW older than 60 years-old (orange), TW (green) and cis men (CM, black). Dashed line corresponds to the median among all measurements (ratio=0.93, lymphocytes=1938 cells/ $\mu$ L). For display purposes, 34 measurements (ratio>8) and 61 measurements (lymphocytes>7000 cells/ $\mu$ L) were excluded from the plot.

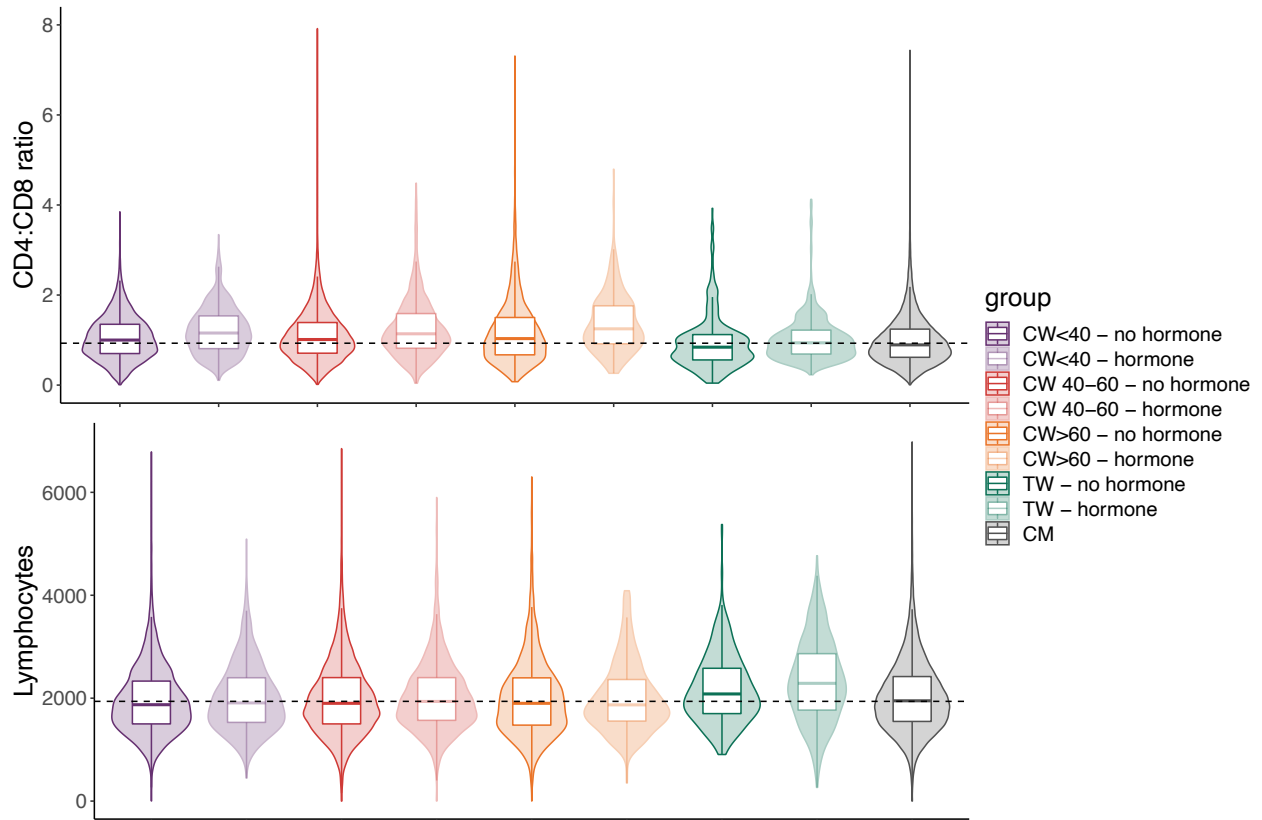

**Supplementary Figure 2:** Distribution of CD4+ and CD8+ T cell counts in the different studied populations: CW aged 40 and younger (purple), CW 40-60 years-old (red), CW older than 60 years-old (orange), TW (green) and cis men (CM, black). Dashed line corresponds to the median among all measurements (CD4=657 cells/ $\mu$ L, CD8=715 cells/ $\mu$ L). For display purposes, 34 measurements (CD4>2500 cells/ $\mu$ L) and 77 measurements (CD8>3500 cells/ $\mu$ L) were excluded from the plot. Each dot corresponds to an individual laboratory measurement.

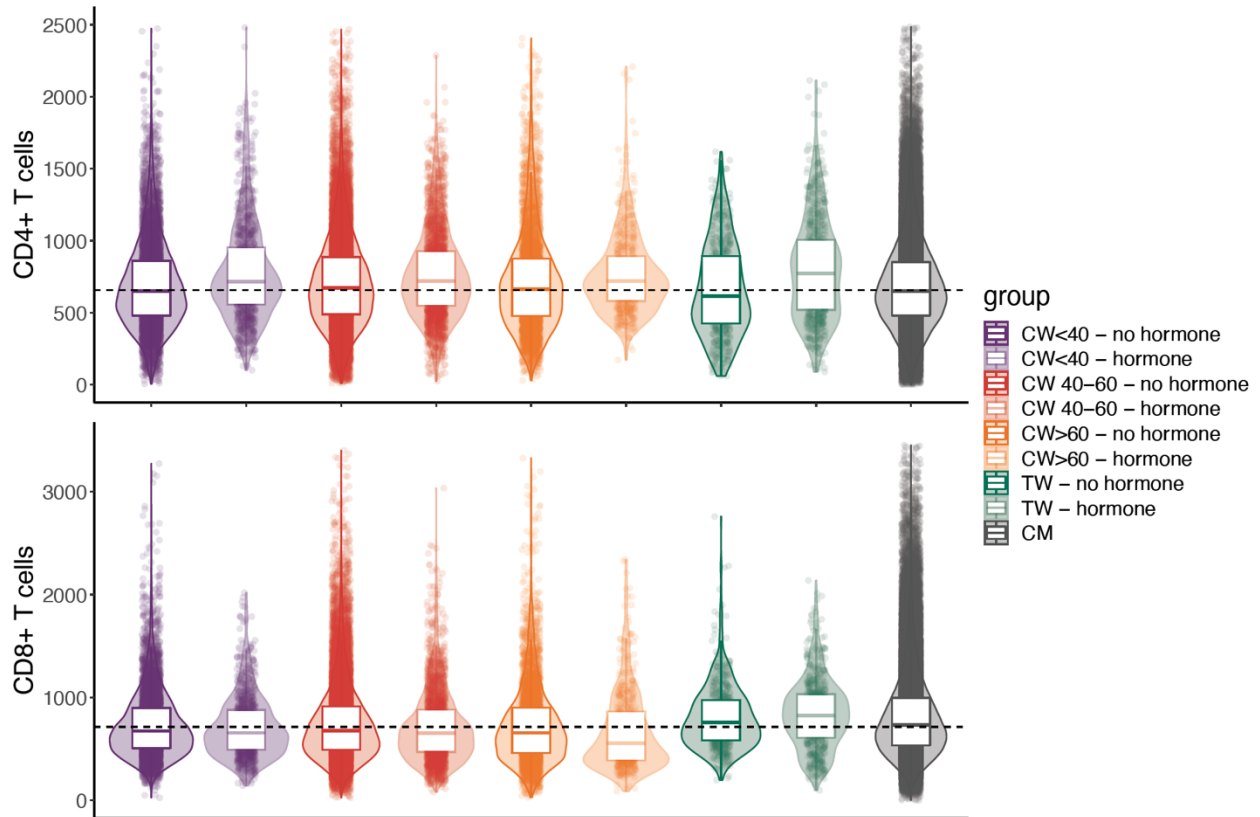

**Supplementary Figure 3.** Method of defining sex hormone reports using data from the SHCS. Products are combined when they overlap on a given period of time. Each period starting with a new product or combination of products is considered as a new report.

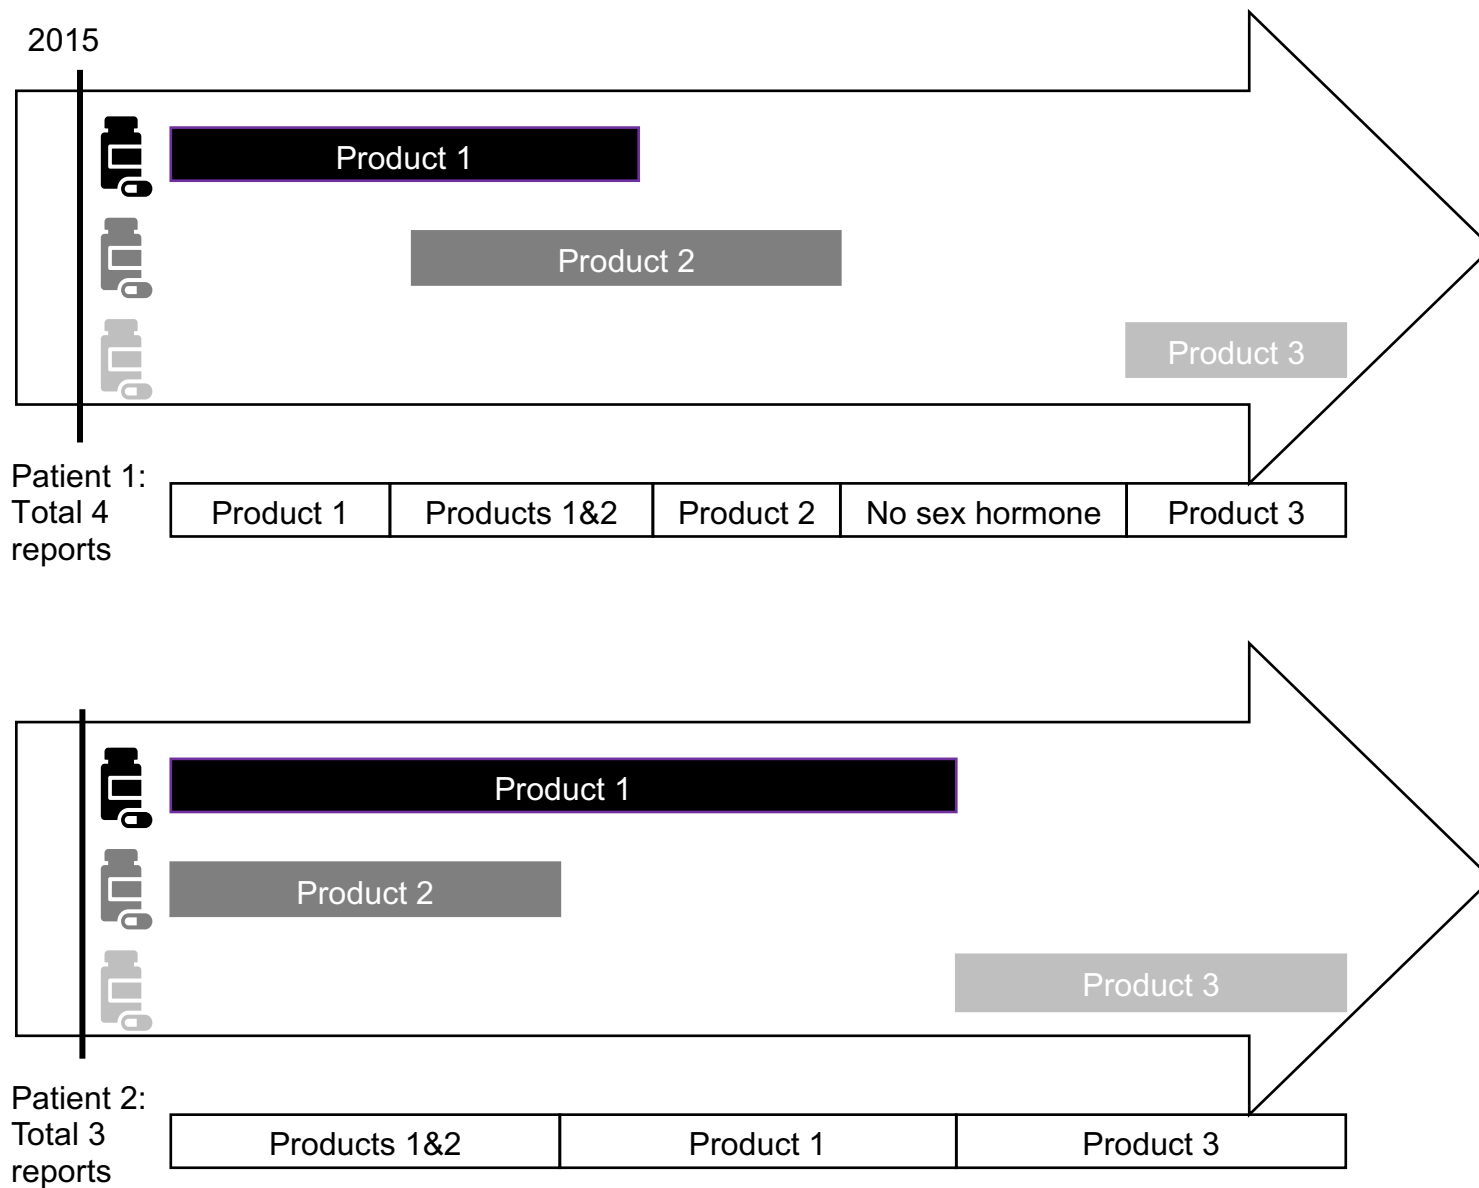

**Supplementary Figure 4.** Effect of sex hormone intake in CW<40 (purple), CW 40-60 (red), CW>60 (orange), and TW (green) on the scaled studied outcomes: CD4 counts, CD8 counts, CD4:CD8 ratio and lymphocytes counts in univariable models (i.e., unadjusted for confounders).

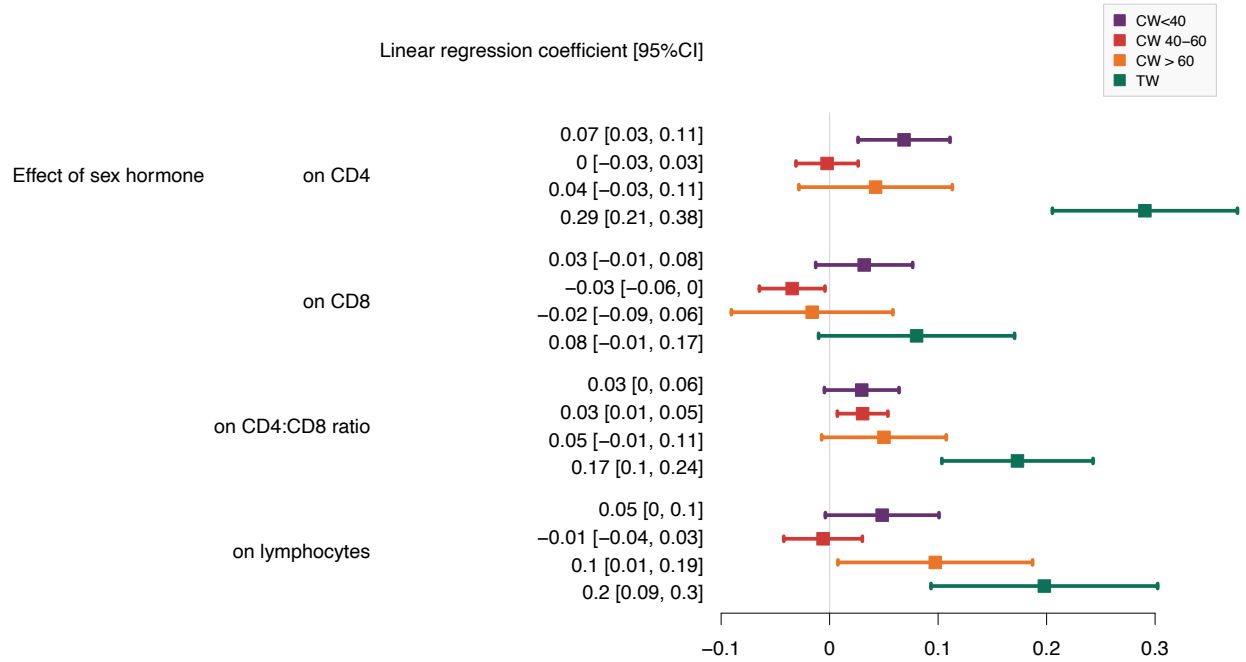

**Supplementary Figure 5.** Lymphocyte counts versus CD4 counts in TW not under sex hormone (dark green) and under sex hormone (light green)

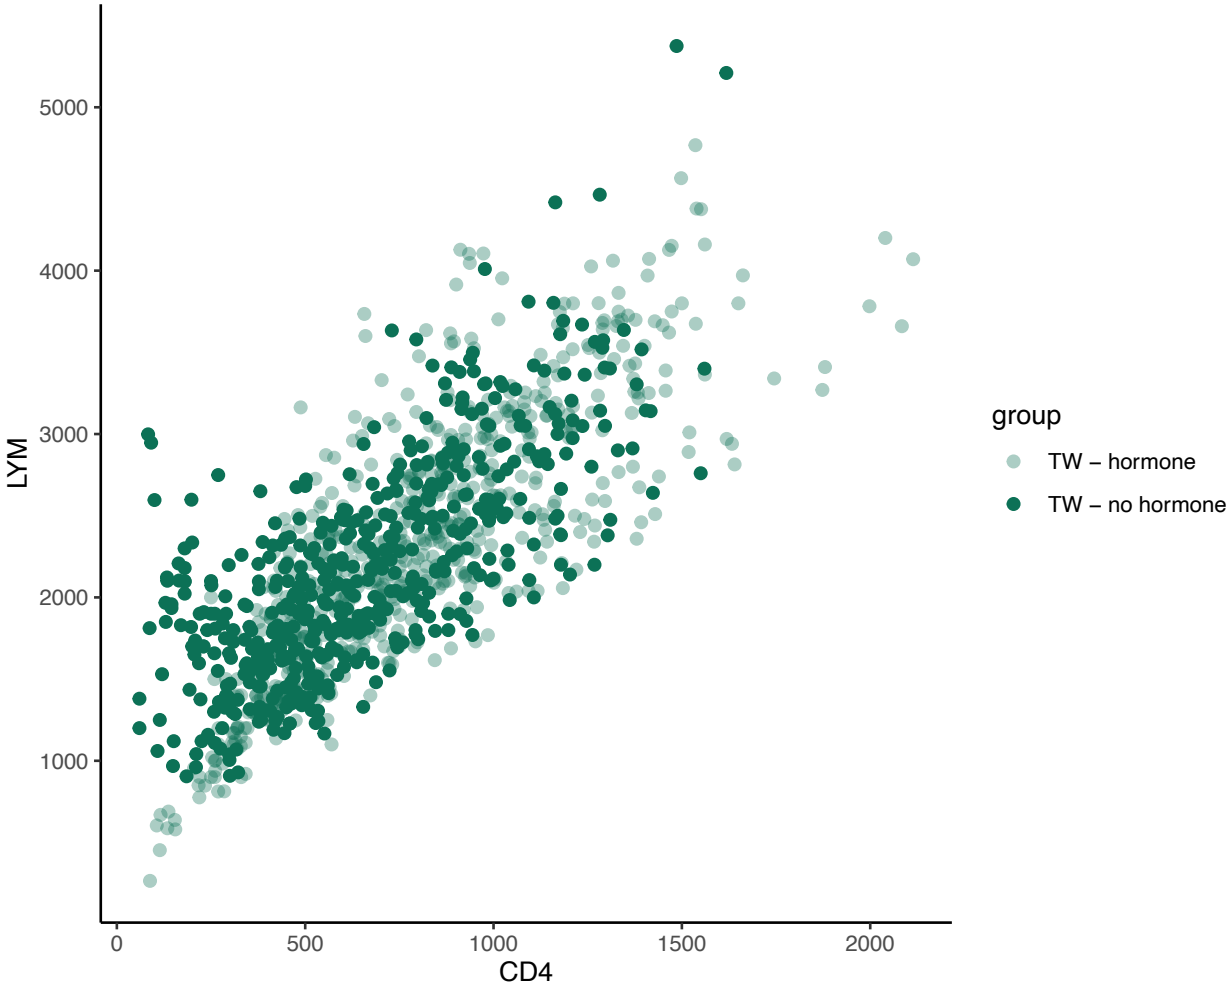

**Supplementary Figure 6. Sensitivity analysis adjusted on smoking and co-infections.**

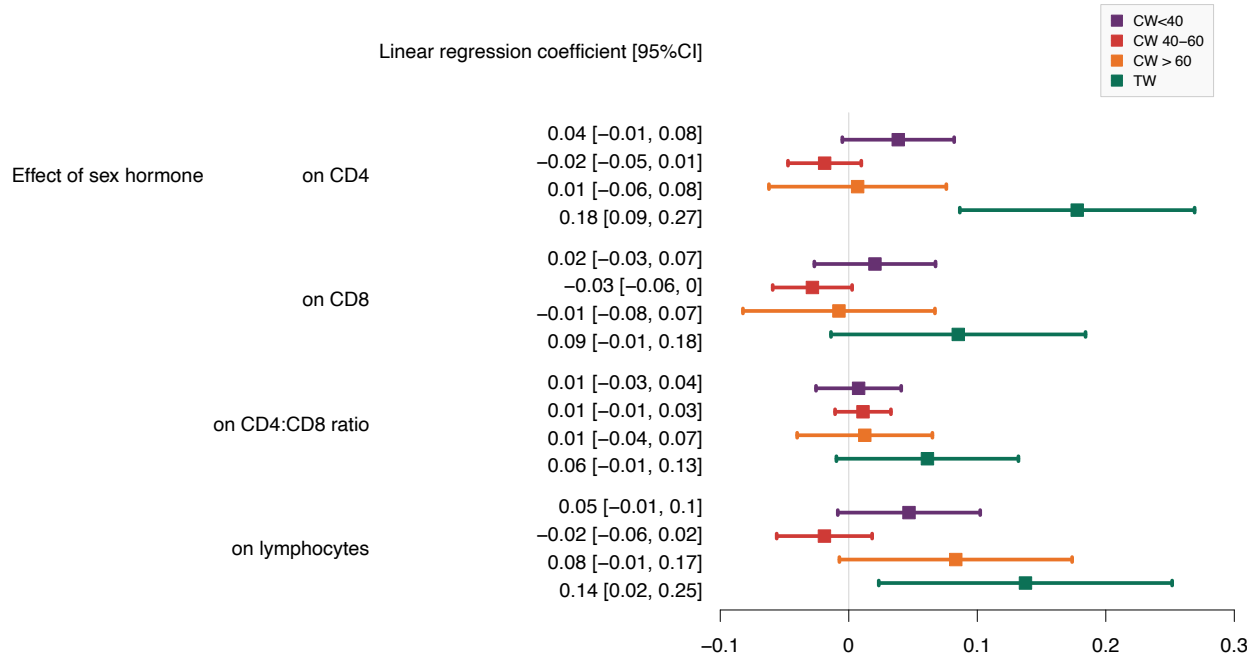

**Supplementary Figure 7. Sensitivity analysis adjusted on viral load, self-reported adherence, and depression.**

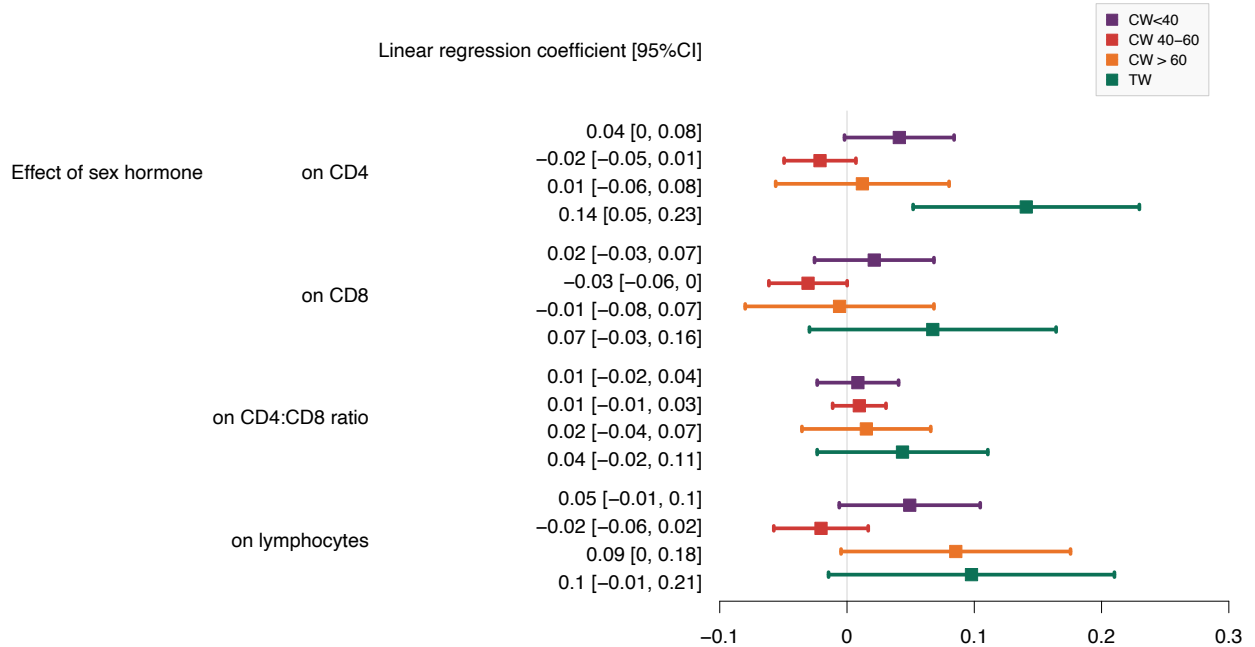

**Supplementary Figure 8.** Comparison of the effect of sex hormones in CW<40 (purple), CW 40-60 (red), CW>60 (orange), and TW (green) and the difference between CW and CM (dark grey) on the studied immune markers

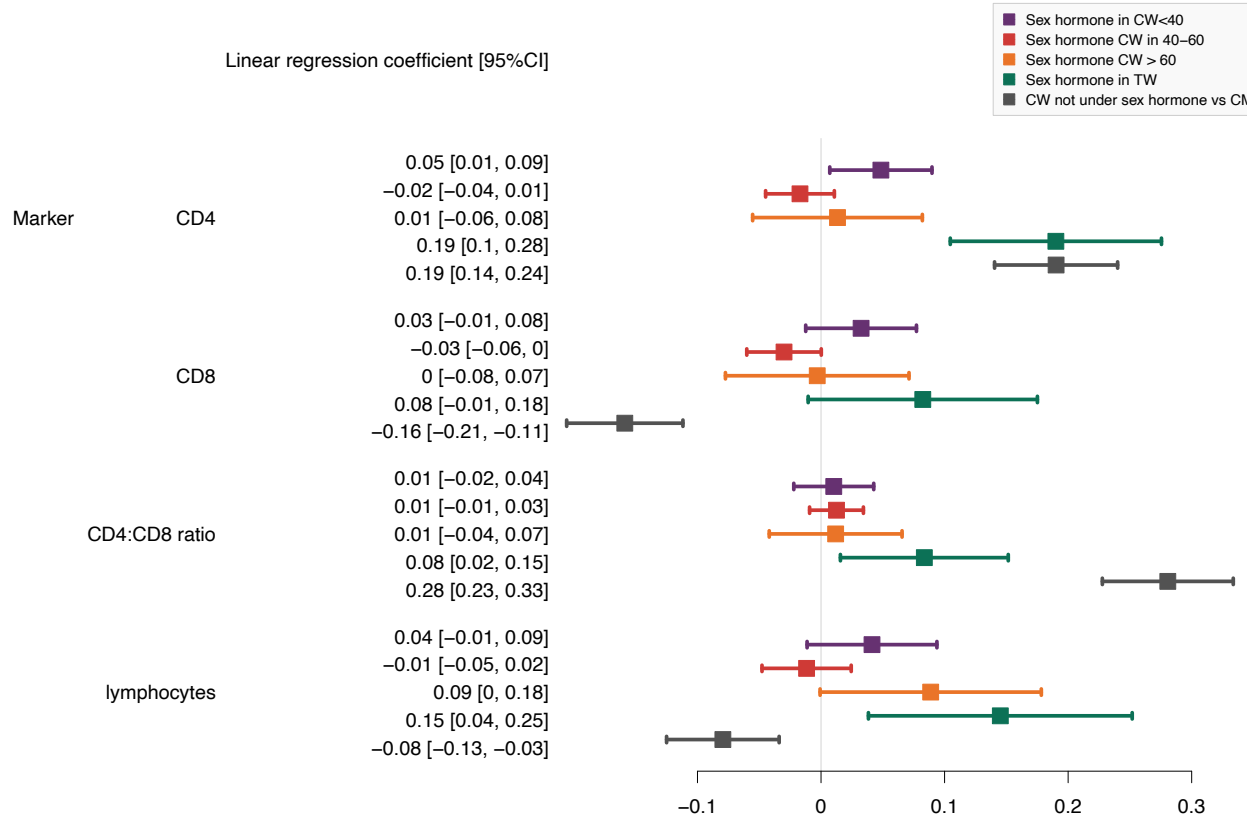

**Supplementary Figure 9.** Heatmap representing the normalized protein expression (NPX) in the 62 studied plasma samples and their classification in two groups: before sex hormone intake (grey) and after sex hormone intake (purple).

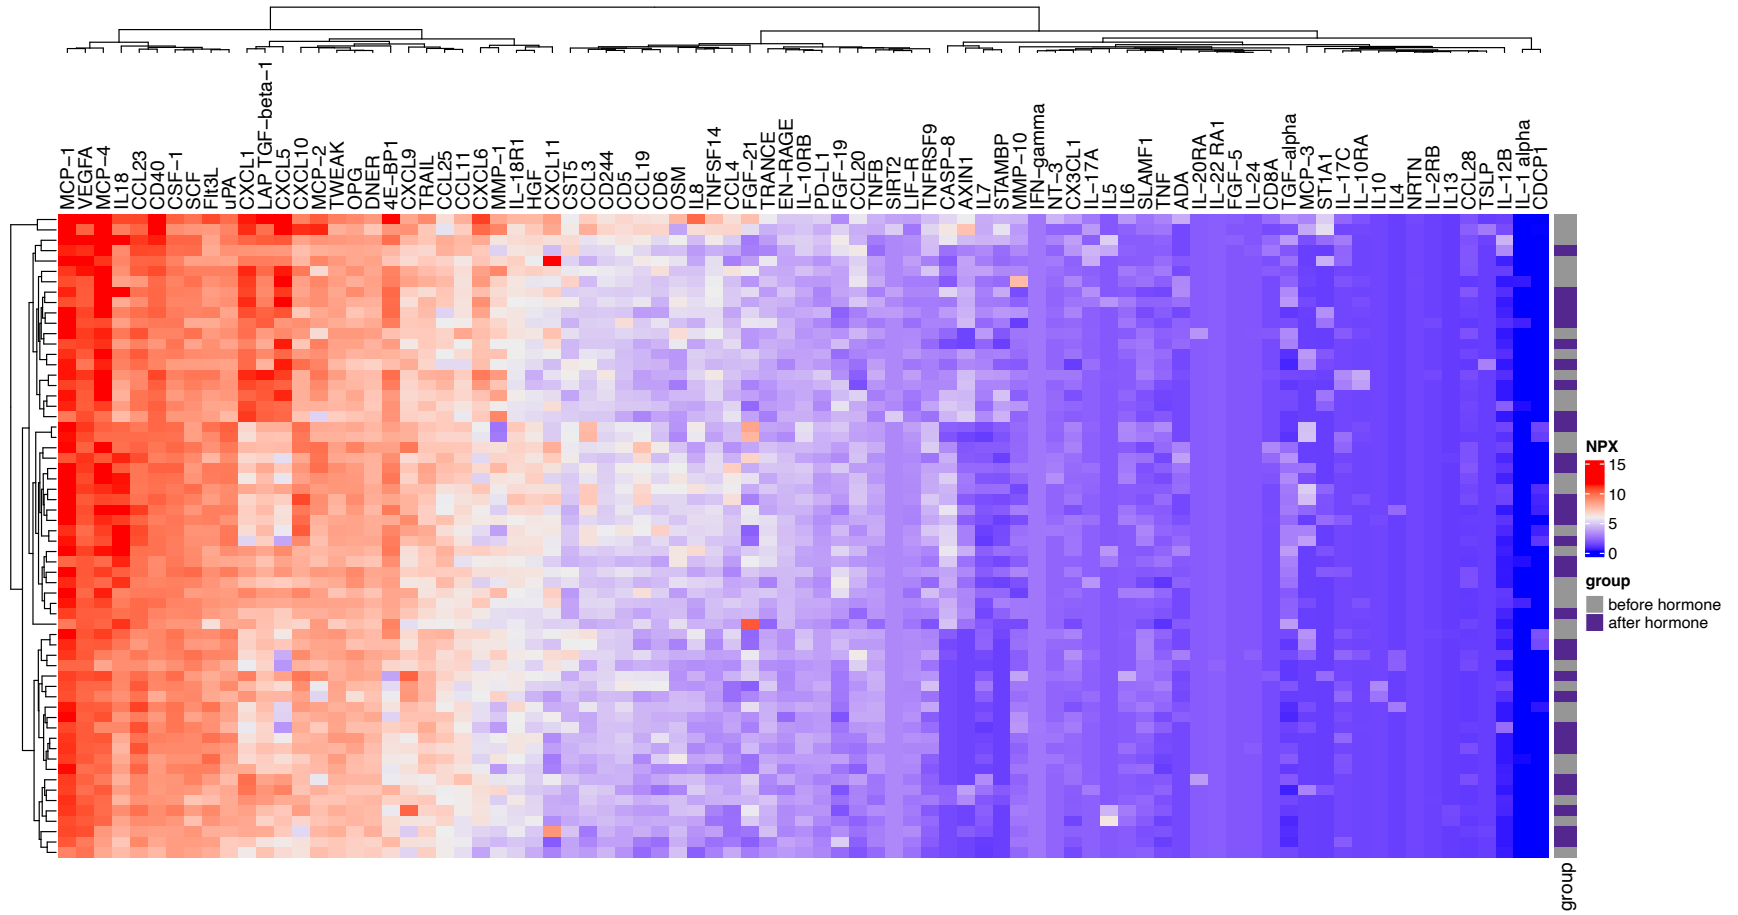



**Supplementary Figure 10.** Normalized protein expression (NPX) of NT-3 and STAMBP in plasma samples before sex hormone intake (grey) and after (purple). Boxplots represent the following: median with the middle line, upper and lower quartiles with the box limits, 1.5x interquartile ranges with the whiskers.

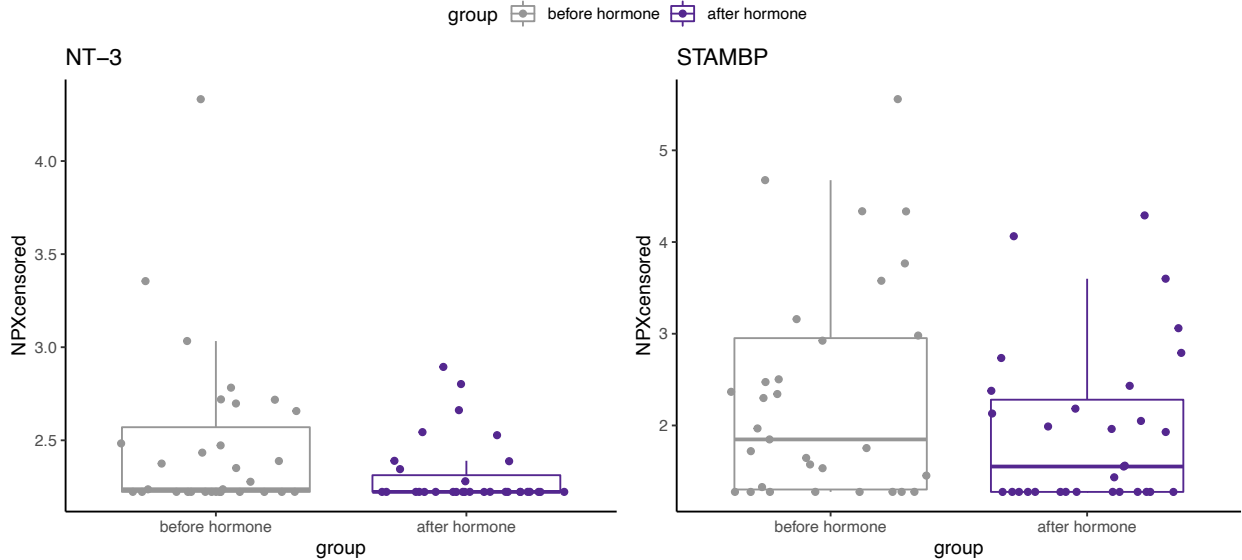

**Supplementary table 1:** Self-reported adherence, viral load (copies/mL), and depression in the different studied groups, with sex hormone intake or not.

|                                     | CW < 40        |                 | CW 40-60        |                 | CW > 60yo      |                | TW            |                |
|-------------------------------------|----------------|-----------------|-----------------|-----------------|----------------|----------------|---------------|----------------|
|                                     | No<br>(N=7968) | Yes<br>(N=1115) | No<br>(N=26666) | Yes<br>(N=2781) | No<br>(N=4981) | Yes<br>(N=546) | No<br>(N=521) | Yes<br>(N=669) |
| <b>Under sex hormones</b>           |                |                 |                 |                 |                |                |               |                |
| <b>Self-reported adherence</b>      |                |                 |                 |                 |                |                |               |                |
| never missed                        | 6336 (79.5%)   | 930 (83.4%)     | 22626 (84.8%)   | 2424 (87.2%)    | 4533 (91.0%)   | 504 (92.3%)    | 456 (87.5%)   | 600 (89.7%)    |
| missed once a month                 | 1008 (12.7%)   | 131 (11.7%)     | 2633 (9.9%)     | 284 (10.2%)     | 302 (6.1%)     | 28 (5.1%)      | 50 (9.6%)     | 48 (7.2%)      |
| missed more than once every 2 weeks | 624 (7.8%)     | 54 (4.8%)       | 1407 (5.3%)     | 73 (2.6%)       | 146 (2.9%)     | 14 (2.6%)      | 15 (2.9%)     | 21 (3.1%)      |
| <b>VL</b>                           |                |                 |                 |                 |                |                |               |                |
| <50                                 | 7445 (93.4%)   | 1075 (96.4%)    | 25512 (95.7%)   | 2697 (97.0%)    | 4773 (95.8%)   | 545 (99.8%)    | 475 (91.2%)   | 659 (98.5%)    |
| 50-1000                             | 379 (4.8%)     | 32 (2.9%)       | 904 (3.4%)      | 60 (2.2%)       | 182 (3.7%)     | 0 (0%)         | 39 (7.5%)     | 9 (1.3%)       |
| >1000                               | 144 (1.8%)     | 8 (0.7%)        | 250 (0.9%)      | 24 (0.9%)       | 26 (0.5%)      | 1 (0.2%)       | 7 (1.3%)      | 1 (0.1%)       |
| <b>Depression</b>                   |                |                 |                 |                 |                |                |               |                |
| No                                  | 7082 (88.9%)   | 965 (86.5%)     | 22334 (83.8%)   | 2326 (83.6%)    | 4207 (84.5%)   | 444 (81.3%)    | 402 (77.2%)   | 503 (75.2%)    |
| Yes                                 | 886 (11.1%)    | 150 (13.5%)     | 4332 (16.2%)    | 455 (16.4%)     | 774 (15.5%)    | 102 (18.7%)    | 119 (22.8%)   | 166 (24.8%)    |

**Supplementary Table 2.** Comparison between protein concentration before and after sex hormone levels. For each protein, we display the test used (paired t.test if no left-censored data, cen\_paired if left-censored data), its corresponding p-value, and the adjusted p-value using FDR method.

| Assay          | pval.test | pval.adjust | test       |
|----------------|-----------|-------------|------------|
| NT-3           | 0.019     | 0.760       | cen_paired |
| STAMBP         | 0.032     | 0.760       | cen_paired |
| CD244          | 0.064     | 0.760       | t.test     |
| CD6            | 0.066     | 0.760       | t.test     |
| IL6            | 0.070     | 0.760       | cen_paired |
| IL7            | 0.084     | 0.760       | cen_paired |
| CASP-8         | 0.091     | 0.760       | cen_paired |
| MCP-4          | 0.100     | 0.760       | t.test     |
| TNFSF14        | 0.109     | 0.760       | t.test     |
| IL18           | 0.113     | 0.760       | t.test     |
| AXIN1          | 0.142     | 0.841       | cen_paired |
| CCL19          | 0.165     | 0.841       | t.test     |
| IL-17C         | 0.193     | 0.841       | cen_paired |
| CCL4           | 0.207     | 0.841       | cen_paired |
| LAP TGF-beta-1 | 0.208     | 0.841       | t.test     |
| TGF-alpha      | 0.264     | 0.841       | t.test     |
| MCP-1          | 0.265     | 0.841       | t.test     |
| CXCL11         | 0.277     | 0.841       | t.test     |
| CXCL6          | 0.291     | 0.841       | t.test     |
| uPA            | 0.312     | 0.841       | t.test     |
| OSM            | 0.316     | 0.841       | t.test     |
| MMP-10         | 0.350     | 0.841       | t.test     |
| CD40           | 0.352     | 0.841       | t.test     |
| TNFRSF9        | 0.366     | 0.841       | t.test     |
| CD5            | 0.368     | 0.841       | t.test     |
| ST1A1          | 0.383     | 0.841       | cen_paired |
| CXCL5          | 0.396     | 0.841       | t.test     |
| IL-10RA        | 0.398     | 0.841       | cen_paired |
| CXCL1          | 0.420     | 0.841       | t.test     |
| 4E-BP1         | 0.429     | 0.841       | t.test     |
| CCL20          | 0.430     | 0.841       | t.test     |
| OPG            | 0.439     | 0.841       | t.test     |
| IL8            | 0.440     | 0.841       | t.test     |
| FGF-21         | 0.456     | 0.841       | cen_paired |
| HGF            | 0.466     | 0.841       | t.test     |
| CCL11          | 0.467     | 0.841       | t.test     |
| ADA            | 0.468     | 0.841       | cen_paired |
| CX3CL1         | 0.483     | 0.841       | t.test     |
| CSF-1          | 0.497     | 0.841       | t.test     |
| TNF            | 0.502     | 0.841       | t.test     |
| TRAIL          | 0.528     | 0.850       | t.test     |
| CCL3           | 0.549     | 0.850       | t.test     |
| MCP-2          | 0.555     | 0.850       | t.test     |
| PD-L1          | 0.558     | 0.850       | t.test     |
| DNER           | 0.581     | 0.866       | t.test     |
| TNFB           | 0.602     | 0.866       | t.test     |
| EN-RAGE        | 0.608     | 0.866       | t.test     |
| VEGFA          | 0.624     | 0.871       | t.test     |
| MCP-3          | 0.665     | 0.893       | cen_paired |
| CCL25          | 0.668     | 0.893       | t.test     |
| CST5           | 0.688     | 0.893       | t.test     |
| IL-18R1        | 0.702     | 0.893       | t.test     |
| LIF-R          | 0.723     | 0.893       | t.test     |
| SCF            | 0.739     | 0.893       | t.test     |
| Flt3L          | 0.741     | 0.893       | t.test     |
| IL-17A         | 0.759     | 0.893       | cen_paired |
| CCL23          | 0.774     | 0.893       | t.test     |
| TWEAK          | 0.781     | 0.893       | t.test     |
| IL-12B         | 0.792     | 0.893       | cen_paired |
| MMP-1          | 0.807     | 0.893       | t.test     |
| CCL28          | 0.813     | 0.893       | cen_paired |
| SLAMF1         | 0.862     | 0.931       | t.test     |
| IL-10RB        | 0.886     | 0.942       | t.test     |
| CXCL10         | 0.906     | 0.943       | t.test     |
| CXCL9          | 0.915     | 0.943       | t.test     |
| TRANCE         | 0.958     | 0.965       | t.test     |
| FGF-19         | 0.965     | 0.965       | cen_paired |
